# Supplementary material for: Mycobacterial MazG Safeguards Genetic Stability via Housecleaning of 5-OH-dCTP
Source: PubMed Central journal article supplement (PMC3855555; doi:10.1371/journal.ppat.1003814), 2013-12-05
Supplement: ppat.1003814.s005.pdf [file ppat.1003814.s005.pdf]

**Table S3. Codon mutations determined in stationary phase (5-day) *Msm*-derived rifampicin-resistant mutant.** All listed codons are rifampicin-resistant hot spots of *rpoB*.

| Sample       | Number of codon mutation (%) |                        |                        |                        |                        |                        |                        |                        |                        |                        |
|--------------|------------------------------|------------------------|------------------------|------------------------|------------------------|------------------------|------------------------|------------------------|------------------------|------------------------|
|              | <sup>432</sup> GAC-TAC       | <sup>432</sup> GAC-GGC | <sup>447</sup> TCG-TGG | <sup>447</sup> TCG-TTG | <sup>438</sup> TCG-TGG | <sup>438</sup> TCG-TTG | <sup>442</sup> CAC-CTC | <sup>442</sup> CAC-GAC | <sup>442</sup> CAC-TAC | <sup>442</sup> CAC-AAC |
| wt           | 22 (46)                      | 1 (2)                  | 11 (23)                | 6 (13)                 | 0                      | 1 (2)                  | 3 (6)                  | 2 (4)                  | 1 (2)                  | 0                      |
| <i>ΔmazG</i> | 1 (2)                        | 0                      | 6 (13)                 | 32 (70)                | 1(2)                   | 0                      | 0                      | 1 (2)                  | 2 (4)                  | 3 (7)                  |
